# Supplementary material
Source: ML conference proceedings conference paper supplement (https://openaccess.thecvf.com/content/WACV2025/html/Cheng_Remote_Blood_Pressure_WACV_2025_paper.html)
Supplement: Supplementary file 1 [file Cheng_Remote_Blood_Pressure_WACV_2025_supplemental.pdf]

**Supplementary Material of the  
WACV 2025 Paper:  
Remote Blood Pressure Estimation from  
Facial Videos using Transfer Learning:  
Leveraging PPG to rPPG Conversion**

# 1 Performance Comparison of Blood Pressure Estimation with PPG Data

| Dataset                | Models           | Normalization | Task-based Learning | with HR           |                   | without HR        |                   |
|------------------------|------------------|---------------|---------------------|-------------------|-------------------|-------------------|-------------------|
|                        |                  |               |                     | MAE (mmHg)<br>SBP | MAE (mmHg)<br>DBP | MAE (mmHg)<br>SBP | MAE (mmHg)<br>DBP |
| MIMIC-III from Kaggle  | Alexnet          | Per Signal    | Multi-task          | 12.020            | 5.752             | 12.165            | 5.824             |
|                        | ResNet           |               |                     | 12.284            | 6.000             | 12.640            | 6.317             |
|                        | BiLSTM           |               |                     | 11.857            | 5.943             | <b>11.121</b>     | <b>5.523</b>      |
|                        | UniLSTM          |               |                     | 18.907            | 8.233             | 19.210            | 8.309             |
|                        | Slapničar et al. |               |                     | 14.152            | 7.662             | 12.882            | 7.333             |
|                        | BP-Net           |               |                     | 12.010            | 5.846             | 11.980            | 5.887             |
| MIMIC-III from Kaggle  | Alexnet          | Per Signal    | Single-task         | 12.397            | 5.689             | 12.227            | 5.822             |
|                        | ResNet           |               |                     | 11.787            | 6.247             | 11.517            | 5.701             |
|                        | BiLSTM           |               |                     | 12.011            | 5.687             | 11.037            | 6.761             |
|                        | UniLSTM          |               |                     | 18.950            | 6.714             | 19.230            | 6.552             |
|                        | Slapničar et al. |               |                     | 13.867            | 6.383             | 12.874            | 6.318             |
|                        | BP-Net           |               |                     | 12.045            | 5.814             | 12.046            | 5.831             |
| MIMIC-III from Kaggle  | Alexnet          | Per Dataset   | Multi-task          | 11.913            | 5.684             | 12.128            | 5.816             |
|                        | ResNet           |               |                     | 12.651            | 6.125             | 12.823            | 6.010             |
|                        | BiLSTM           |               |                     | 11.404            | 5.503             | 11.321            | 5.561             |
|                        | UniLSTM          |               |                     | 12.481            | 6.213             | 13.346            | 6.627             |
|                        | Slapničar et al. |               |                     | 13.883            | 7.594             | 11.980            | 7.286             |
|                        | BP-Net           |               |                     | 11.367            | 5.667             | 11.353            | 5.602             |
| MIMIC-III from Kaggle  | Alexnet          | Per Dataset   | Single-task         | 12.195            | 5.903             | 12.206            | 5.650             |
|                        | ResNet           |               |                     | 13.203            | 6.126             | 12.212            | 6.148             |
|                        | BiLSTM           |               |                     | 12.881            | 7.146             | 13.032            | 7.729             |
|                        | UniLSTM          |               |                     | 13.169            | 7.666             | 13.389            | 7.783             |
|                        | Slapničar et al. |               |                     | 14.625            | 5.804             | 11.888            | 5.958             |
|                        | BP-Net           |               |                     | 11.333            | 5.587             | 11.446            | 5.586             |
| MIMIC-III from PulseDB | Alexnet          | Per Signal    | Multi-task          | 15.229            | 8.798             | 15.132            | 8.573             |
|                        | ResNet           |               |                     | 14.907            | 8.410             | 14.974            | 8.249             |
|                        | BiLSTM           |               |                     | 15.420            | 8.451             | 14.810            | 8.545             |
|                        | UniLSTM          |               |                     | 17.720            | 9.572             | 17.046            | 8.458             |
|                        | Slapničar et al. |               |                     | 15.606            | 8.963             | 16.105            | 9.045             |
|                        | BP-Net           |               |                     | 17.203            | 8.781             | 17.141            | 8.778             |
| MIMIC-III from PulseDB | Alexnet          | Per Signal    | Single-task         | 15.427            | 8.728             | 15.187            | 8.502             |
|                        | ResNet           |               |                     | 14.928            | 8.409             | 15.078            | 8.417             |
|                        | BiLSTM           |               |                     | 14.907            | 8.445             | 15.074            | 8.179             |
|                        | UniLSTM          |               |                     | 17.112            | 8.436             | 17.003            | 8.294             |
|                        | Slapničar et al. |               |                     | 16.015            | 8.619             | <b>14.936</b>     | <b>8.179</b>      |
|                        | BP-Net           |               |                     | 17.225            | 8.752             | 17.170            | 8.753             |
| MIMIC-III from PulseDB | Alexnet          | Per Dataset   | Multi-task          | 15.138            | 8.540             | 15.685            | 8.539             |
|                        | ResNet           |               |                     | 14.965            | 8.429             | 15.115            | 8.414             |
|                        | BiLSTM           |               |                     | 15.199            | 8.803             | 14.860            | 8.518             |
|                        | UniLSTM          |               |                     | 17.667            | 9.520             | 15.155            | 8.574             |
|                        | Slapničar et al. |               |                     | 15.706            | 9.336             | 15.188            | 8.435             |
|                        | BP-Net           |               |                     | 17.429            | 8.691             | 17.394            | 8.711             |
| MIMIC-III from PulseDB | Alexnet          | Per Dataset   | Single-task         | 15.288            | 8.573             | 15.218            | 8.586             |
|                        | ResNet           |               |                     | 14.831            | 8.550             | 15.250            | 8.487             |
|                        | BiLSTM           |               |                     | 14.714            | 9.497             | 14.887            | 8.419             |
|                        | UniLSTM          |               |                     | 15.915            | 9.466             | 14.893            | 9.603             |
|                        | Slapničar et al. |               |                     | 15.952            | 8.737             | 16.168            | 8.315             |
|                        | BP-Net           |               |                     | 17.504            | 8.680             | 17.384            | 8.715             |

Table 1: Performance comparison of deep learning models trained and tested on different PPG datasets. Mean absolute error (MAE) in mmHg was used as an evaluation metric. The best performing models for each dataset were in bold.

## 2 Performance Comparison of Blood Pressure Estimation by Transfer Learning with rPPG Data

| Pretrain Dataset       | Models                     | Normalization | Loss Function       | with HR           |              | without HR        |        |
|------------------------|----------------------------|---------------|---------------------|-------------------|--------------|-------------------|--------|
|                        |                            |               |                     | MAE (mmHg)<br>SBP | DBP          | MAE (mmHg)<br>SBP | DBP    |
| MIMIC-III from Kaggle  | Alexnet                    | Per Signal    | Mean Absolute Error | 14.462            | 10.158       | 15.907            | 11.166 |
|                        | ResNet                     |               |                     | 10.270            | 10.435       | 12.012            | 9.856  |
|                        | BiLSTM                     |               |                     | 9.886             | 9.381        | 12.081            | 10.083 |
|                        | Slapničar et al.<br>BP-Net |               |                     | 10.711            | 10.084       | 10.803            | 10.190 |
|                        |                            |               |                     | 11.353            | 10.066       | 11.136            | 9.602  |
| MIMIC-III from Kaggle  | Alexnet                    | Per Signal    | Mean Squared Error  | 13.784            | 9.768        | 15.507            | 11.063 |
|                        | ResNet                     |               |                     | 10.058            | 10.916       | 11.790            | 10.263 |
|                        | BiLSTM                     |               |                     | 9.927             | 9.986        | 11.460            | 10.516 |
|                        | Slapničar et al.<br>BP-Net |               |                     | 10.879            | 10.828       | 11.136            | 10.037 |
|                        |                            |               |                     | 11.338            | 9.943        | 10.616            | 10.135 |
| MIMIC-III from Kaggle  | Alexnet                    | Per Dataset   | Mean Absolute Error | 13.200            | 9.364        | 14.995            | 9.559  |
|                        | ResNet                     |               |                     | 9.731             | 10.192       | 11.220            | 10.224 |
|                        | BiLSTM                     |               |                     | <b>8.721</b>      | <b>8.653</b> | 12.053            | 9.799  |
|                        | Slapničar et al.<br>BP-Net |               |                     | 13.587            | 11.267       | 10.421            | 10.226 |
|                        |                            |               |                     | 11.422            | 10.181       | 11.601            | 10.107 |
| MIMIC-III from Kaggle  | Alexnet                    | Per Dataset   | Mean Squared Error  | 12.163            | 9.029        | 13.234            | 10.639 |
|                        | ResNet                     |               |                     | 10.159            | 10.173       | 11.054            | 10.527 |
|                        | BiLSTM                     |               |                     | 9.056             | 9.424        | 12.031            | 10.698 |
|                        | Slapničar et al.<br>BP-Net |               |                     | 14.033            | 10.700       | 10.587            | 10.599 |
|                        |                            |               |                     | 11.154            | 9.693        | 11.846            | 10.104 |
| MIMIC-III from PulseDB | Alexnet                    | Per Signal    | Mean Absolute Error | 14.607            | 9.130        | 14.331            | 9.371  |
|                        | ResNet                     |               |                     | 10.550            | 10.271       | 11.692            | 10.289 |
|                        | BiLSTM                     |               |                     | 9.644             | 9.773        | 11.529            | 10.355 |
|                        | Slapničar et al.<br>BP-Net |               |                     | 11.047            | 10.425       | 10.846            | 10.285 |
|                        |                            |               |                     | 11.271            | 10.247       | 11.209            | 9.985  |
| MIMIC-III from PulseDB | Alexnet                    | Per Signal    | Mean Squared Error  | 13.752            | 9.374        | 14.764            | 9.197  |
|                        | ResNet                     |               |                     | 10.982            | 10.401       | 11.419            | 10.232 |
|                        | BiLSTM                     |               |                     | 9.443             | 10.025       | 11.637            | 10.362 |
|                        | Slapničar et al.<br>BP-Net |               |                     | 11.837            | 10.535       | 11.328            | 9.993  |
|                        |                            |               |                     | 10.921            | 9.782        | 11.584            | 9.532  |
| MIMIC-III from PulseDB | Alexnet                    | Per Dataset   | Mean Absolute Error | 14.822            | 9.644        | 14.382            | 10.237 |
|                        | ResNet                     |               |                     | 10.312            | 10.389       | 12.731            | 11.232 |
|                        | BiLSTM                     |               |                     | 9.359             | 10.307       | 12.824            | 9.932  |
|                        | Slapničar et al.<br>BP-Net |               |                     | 13.439            | 11.299       | 10.809            | 10.330 |
|                        |                            |               |                     | 11.361            | 9.712        | 11.664            | 9.649  |
| MIMIC-III from PulseDB | Alexnet                    | Per Dataset   | Mean Squared Error  | 13.692            | 9.794        | 15.296            | 9.404  |
|                        | ResNet                     |               |                     | 10.502            | 9.900        | 12.517            | 11.184 |
|                        | BiLSTM                     |               |                     | 9.625             | 10.026       | 12.981            | 10.468 |
|                        | Slapničar et al.<br>BP-Net |               |                     | 12.677            | 10.972       | 10.709            | 10.135 |
|                        |                            |               |                     | 11.590            | 9.841        | 11.700            | 9.739  |
| No Pretrain            | Alexnet                    | Per Signal    | Mean Absolute Error | 15.344            | 10.926       | 15.702            | 11.410 |
|                        | ResNet                     |               |                     | 11.315            | 11.114       | 12.716            | 10.869 |
|                        | BiLSTM                     |               |                     | 12.683            | 10.385       | 13.645            | 10.489 |
|                        | Slapničar et al.<br>BP-Net |               |                     | 16.224            | 11.565       | 13.308            | 11.530 |
|                        |                            |               |                     | 12.266            | 10.969       | 12.399            | 11.065 |
| No Pretrain            | Alexnet                    | Per Signal    | Mean Squared Error  | 14.656            | 10.421       | 17.471            | 11.357 |
|                        | ResNet                     |               |                     | 12.043            | 11.642       | 12.318            | 10.992 |
|                        | BiLSTM                     |               |                     | 12.004            | 10.953       | 13.576            | 10.912 |
|                        | Slapničar et al.<br>BP-Net |               |                     | 16.000            | 11.754       | 13.499            | 11.078 |
|                        |                            |               |                     | 12.541            | 11.910       | 12.489            | 10.885 |
| No Pretrain            | Alexnet                    | Per Dataset   | Mean Absolute Error | 15.685            | 10.745       | 15.980            | 10.977 |
|                        | ResNet                     |               |                     | 11.243            | 11.326       | 13.241            | 11.692 |
|                        | BiLSTM                     |               |                     | 10.603            | 11.110       | 14.011            | 10.515 |
|                        | Slapničar et al.<br>BP-Net |               |                     | 20.735            | 12.274       | 16.146            | 11.126 |
|                        |                            |               |                     | 12.241            | 10.838       | 12.480            | 11.113 |
| No Pretrain            | Alexnet                    | Per Dataset   | Mean Squared Error  | 14.353            | 10.460       | 16.189            | 11.575 |
|                        | ResNet                     |               |                     | 11.173            | 11.268       | 13.452            | 11.897 |
|                        | BiLSTM                     |               |                     | 10.141            | 10.810       | 13.592            | 11.707 |
|                        | Slapničar et al.<br>BP-Net |               |                     | 20.673            | 12.450       | 16.467            | 11.534 |
|                        |                            |               |                     | 12.610            | 10.823       | 12.556            | 10.954 |

Table 2: Performance comparison of deep learning models with different training settings on the rPPG-LUH. The 4-fold averaged results were reported. Mean absolute error (MAE) in mmHg was used as an evaluation metric. The best performing model for rPPG-LUH was in bold.

### 3 Results of the Statistical Tests of Blood Pressure Estimation by Transfer Learning with rPPG Data

#### 3.1 Results of the paired t-tests based on pretrain setting (pretrained with PPG datasets vs No pretrain)

##### 3.1.1 Pretrained with MIMIC-III from Kaggle vs No pretrain

Alexnet

| Normalization | Loss Function       | with HR                         |           | without HR                      |            |
|---------------|---------------------|---------------------------------|-----------|---------------------------------|------------|
|               |                     | $T_c = 1.96 / -1.96$<br>T-value | p-value   | $T_c = 1.96 / -1.96$<br>T-value | p-value    |
| Per Signal    | Mean Absolute Error | 3.499                           | 4.699e-04 | -25.849                         | 1.819e-141 |
| Per Signal    | Mean Squared Error  | 56.479                          | 1.374e-47 | -23.225                         | 1.853e-115 |
| Per Dataset   | Mean Absolute Error | 13.956                          | 9.574e-44 | 18.901                          | 5.882e-78  |
| Per Dataset   | Mean Squared Error  | -21.060                         | 8.053e-96 | -36.696                         | 3.105e-272 |

Table 3: Results of the paired t-tests based on pretrain setting (pretrained with MIMIC-III from Kaggle vs No pretrain) for SBP prediction with Alexnet.

| Normalization | Loss Function       | with HR                         |            | without HR                      |            |
|---------------|---------------------|---------------------------------|------------|---------------------------------|------------|
|               |                     | $T_c = 1.96 / -1.96$<br>T-value | p-value    | $T_c = 1.96 / -1.96$<br>T-value | p-value    |
| Per Signal    | Mean Absolute Error | -11.914                         | 1.914e-32  | -35.964                         | 2.479e-262 |
| Per Signal    | Mean Squared Error  | -10.195                         | 2.940e-24  | -11.588                         | 8.398e-31  |
| Per Dataset   | Mean Absolute Error | -36.780                         | 2.234e-273 | 1.986                           | 4.704e-02  |
| Per Dataset   | Mean Squared Error  | -13.171                         | 3.346e-39  | -39.873                         | 0.000      |

Table 4: Results of the paired t-tests based on pretrain setting (pretrained with MIMIC-III from Kaggle vs No pretrain) for DBP prediction with Alexnet.

Resnet

| Normalization | Loss Function       | with HR                         |            | without HR                      |            |
|---------------|---------------------|---------------------------------|------------|---------------------------------|------------|
|               |                     | $T_c = 1.96 / -1.96$<br>T-value | p-value    | $T_c = 1.96 / -1.96$<br>T-value | p-value    |
| Per Signal    | Mean Absolute Error | -30.869                         | 1.398e-197 | 51.076                          | 0.000      |
| Per Signal    | Mean Squared Error  | 36.178                          | 3.279e-265 | -38.575                         | 2.869e-298 |
| Per Dataset   | Mean Absolute Error | -42.498                         | 0.000      | -23.001                         | 2.380e-113 |
| Per Dataset   | Mean Squared Error  | -13.094                         | 9.065e-39  | -9.989                          | 2.335e-23  |

Table 5: Results of the paired t-tests based on pretrain setting (pretrained with MIMIC-III from Kaggle vs No pretrain) for SBP prediction with ResNet.

| Normalization | Loss Function       | with HR                         |            | without HR                      |            |
|---------------|---------------------|---------------------------------|------------|---------------------------------|------------|
|               |                     | $T_c = 1.96 / -1.96$<br>T-value | p-value    | $T_c = 1.96 / -1.96$<br>T-value | p-value    |
| Per Signal    | Mean Absolute Error | 43.635                          | 0.000      | 15.659                          | 1.925e-54  |
| Per Signal    | Mean Squared Error  | -44.913                         | 0.000      | -43.029                         | 0.000      |
| Per Dataset   | Mean Absolute Error | -9.579                          | 1.280e-21  | -31.179                         | 2.600e-201 |
| Per Dataset   | Mean Squared Error  | 34.443                          | 3.139e-242 | -53.687                         | 0.000      |

Table 6: Results of the paired t-tests based on pretrain setting (pretrained with MIMIC-III from Kaggle vs No pretrain) for DBP prediction with ResNet.

**BiLSTM**

| Normalization | Loss Function       | with HR                         |            | without HR                      |            |
|---------------|---------------------|---------------------------------|------------|---------------------------------|------------|
|               |                     | $T_c = 1.96 / -1.96$<br>T-value | p-value    | $T_c = 1.96 / -1.96$<br>T-value | p-value    |
| Per Signal    | Mean Absolute Error | -6.628                          | 3.620e-11  | -20.633                         | 3.777e-92  |
| Per Signal    | Mean Squared Error  | 3.517                           | 4.391e-04  | 8.348                           | 8.106e-17  |
| Per Dataset   | Mean Absolute Error | 26.756                          | 5.277e-151 | 22.070                          | 8.880e-105 |
| Per Dataset   | Mean Squared Error  | -40.819                         | 0.000      | -3.009                          | 2.628e-03  |

Table 7: Results of the paired t-tests based on pretrain setting (pretrained with MIMIC-III from Kaggle vs No pretrain) for SBP prediction with BiLSTM.

| Normalization | Loss Function       | with HR                         |           | without HR                      |           |
|---------------|---------------------|---------------------------------|-----------|---------------------------------|-----------|
|               |                     | $T_c = 1.96 / -1.96$<br>T-value | p-value   | $T_c = 1.96 / -1.96$<br>T-value | p-value   |
| Per Signal    | Mean Absolute Error | -16.316                         | 7.059e-59 | -2.908                          | 3.644e-03 |
| Per Signal    | Mean Squared Error  | 16.078                          | 2.989e-57 | -11.880                         | 2.824e-32 |
| Per Dataset   | Mean Absolute Error | -15.988                         | 1.202e-56 | 8.932                           | 5.143e-19 |
| Per Dataset   | Mean Squared Error  | -3.310                          | 9.378e-04 | 11.786                          | 8.510e-32 |

Table 8: Results of the paired t-tests based on pretrain setting (pretrained with MIMIC-III from Kaggle vs No pretrain) for DBP prediction with BiLSTM.

Slapničar et al.

| Normalization | Loss Function       | with HR                         |           | without HR                      |            |
|---------------|---------------------|---------------------------------|-----------|---------------------------------|------------|
|               |                     | $T_c = 1.96 / -1.96$<br>T-value | p-value   | $T_c = 1.96 / -1.96$<br>T-value | p-value    |
| Per Signal    | Mean Absolute Error | -8.593                          | 1.015e-17 | 23.173                          | 5.718e-115 |
| Per Signal    | Mean Squared Error  | -2.316                          | 7.522e-03 | 25.091                          | 1.048e-133 |
| Per Dataset   | Mean Absolute Error | 11.056                          | 3.327e-28 | -13.483                         | 5.582e-41  |
| Per Dataset   | Mean Squared Error  | 42.698                          | 0.000     | 9.390                           | 7.694e-21  |

Table 9: Results of the paired t-tests based on pretrain setting (pretrained with MIMIC-III from Kaggle vs No pretrain) for SBP prediction with Slapničar et al..

| Normalization | Loss Function       | with HR                         |            | without HR                      |            |
|---------------|---------------------|---------------------------------|------------|---------------------------------|------------|
|               |                     | $T_c = 1.96 / -1.96$<br>T-value | p-value    | $T_c = 1.96 / -1.96$<br>T-value | p-value    |
| Per Signal    | Mean Absolute Error | -24.614                         | 6.210e-129 | 45.108                          | 0.000      |
| Per Signal    | Mean Squared Error  | 32.269                          | 1.248e-214 | 14.625                          | 8.192e-48  |
| Per Dataset   | Mean Absolute Error | 5.924                           | 3.277e-09  | 8.619                           | 8.072e-18  |
| Per Dataset   | Mean Squared Error  | 33.102                          | 4.841e-225 | 21.978                          | 6.071e-104 |

Table 10: Results of the paired t-tests based on pretrain setting (pretrained with MIMIC-III from Kaggle vs No pretrain) for DBP prediction with Slapničar et al..

**BP-Net**

| Normalization | Loss Function       | with HR                         |           | without HR                      |           |
|---------------|---------------------|---------------------------------|-----------|---------------------------------|-----------|
|               |                     | $T_c = 1.96 / -1.96$<br>T-value | p-value   | $T_c = 1.96 / -1.96$<br>T-value | p-value   |
| Per Signal    | Mean Absolute Error | 2.911                           | 3.621e-02 | -4.736                          | 2.222e-06 |
| Per Signal    | Mean Squared Error  | -5.363                          | 8.412e-08 | 4.557                           | 5.258e-06 |
| Per Dataset   | Mean Absolute Error | -2.754                          | 7.949e-03 | 8.007                           | 1.342e-15 |
| Per Dataset   | Mean Squared Error  | 6.061                           | 1.411e-09 | -3.896                          | 9.879e-05 |

Table 11: Results of the paired t-tests based on pretrain setting (pretrained with MIMIC-III from Kaggle vs No pretrain) for SBP prediction with BP-Net.

| Normalization | Loss Function       | with HR                         |           | without HR                      |            |
|---------------|---------------------|---------------------------------|-----------|---------------------------------|------------|
|               |                     | $T_c = 1.96 / -1.96$<br>T-value | p-value   | $T_c = 1.96 / -1.96$<br>T-value | p-value    |
| Per Signal    | Mean Absolute Error | 11.211                          | 5.983e-29 | -4.647                          | 3.417e-06  |
| Per Signal    | Mean Squared Error  | 7.188                           | 7.167e-13 | 5.186                           | 2.206e-07  |
| Per Dataset   | Mean Absolute Error | 2.148                           | 2.508e-02 | 22.870                          | 4.041e-112 |
| Per Dataset   | Mean Squared Error  | 6.706                           | 2.145e-11 | 2.584                           | 1.133e-02  |

Table 12: Results of the paired t-tests based on pretrain setting (pretrained with MIMIC-III from Kaggle vs No pretrain) for DBP prediction with BP-Net.



### 3.1.2 Pretrained with MIMIC-III from PulseDB vs No pretrain

Alexnet

| Normalization | Loss Function       | with HR                         |           | without HR                      |            |
|---------------|---------------------|---------------------------------|-----------|---------------------------------|------------|
|               |                     | $T_c = 1.96 / -1.96$<br>T-value | p-value   | $T_c = 1.96 / -1.96$<br>T-value | p-value    |
| Per Signal    | Mean Absolute Error | 8.301                           | 1.201e-16 | -23.470                         | 8.722e-118 |
| Per Signal    | Mean Squared Error  | -14.544                         | 2.622e-47 | -32.452                         | 6.595e-217 |
| Per Dataset   | Mean Absolute Error | 17.553                          | 1.102e-67 | 2.333                           | 1.965e-02  |
| Per Dataset   | Mean Squared Error  | -2.630                          | 8.547e-03 | -33.449                         | 1.928e-229 |

Table 13: Results of the paired t-tests based on pretrain setting (pretrained with MIMIC-III from PulseDB vs No pretrain) for SBP prediction with Alexnet.

| Normalization | Loss Function       | with HR                         |            | without HR                      |           |
|---------------|---------------------|---------------------------------|------------|---------------------------------|-----------|
|               |                     | $T_c = 1.96 / -1.96$<br>T-value | p-value    | $T_c = 1.96 / -1.96$<br>T-value | p-value   |
| Per Signal    | Mean Absolute Error | -17.204                         | 3.842e-65  | -39.638                         | 0.000     |
| Per Signal    | Mean Squared Error  | -28.756                         | 5.491e-173 | -14.122                         | 9.718e-45 |
| Per Dataset   | Mean Absolute Error | -23.561                         | 1.169e-118 | 4.182                           | 2.925e-05 |
| Per Dataset   | Mean Squared Error  | 7.355                           | 2.100e-13  | -15.165                         | 3.204e-51 |

Table 14: Results of the paired t-tests based on pretrain setting (pretrained with MIMIC-III from PulseDB vs No pretrain) for DBP prediction with Alexnet.

ResNet

| Normalization | Loss Function       | with HR                         |            | without HR                      |            |
|---------------|---------------------|---------------------------------|------------|---------------------------------|------------|
|               |                     | $T_c = 1.96 / -1.96$<br>T-value | p-value    | $T_c = 1.96 / -1.96$<br>T-value | p-value    |
| Per Signal    | Mean Absolute Error | -10.120                         | 6.291e-24  | 14.954                          | 7.118e-50  |
| Per Signal    | Mean Squared Error  | 31.958                          | 8.501e-211 | -26.544                         | 9.512e-149 |
| Per Dataset   | Mean Absolute Error | -17.886                         | 3.663e-70  | 2.518                           | 6.045e-03  |
| Per Dataset   | Mean Squared Error  | -2.078                          | 2.810e-02  | -15.493                         | 2.359e-53  |

Table 15: Results of the paired t-tests based on pretrain setting (pretrained with MIMIC-III from PulseDB vs No pretrain) for SBP prediction with ResNet.

| Normalization | Loss Function       | with HR                         |            | without HR                      |           |
|---------------|---------------------|---------------------------------|------------|---------------------------------|-----------|
|               |                     | $T_c = 1.96 / -1.96$<br>T-value | p-value    | $T_c = 1.96 / -1.96$<br>T-value | p-value   |
| Per Signal    | Mean Absolute Error | 51.365                          | 0.000      | 9.810                           | 1.380e-22 |
| Per Signal    | Mean Squared Error  | -21.517                         | 7.859e-100 | -18.547                         | 3.431e-75 |
| Per Dataset   | Mean Absolute Error | -22.891                         | 2.567e-112 | -7.977                          | 1.715e-15 |
| Per Dataset   | Mean Squared Error  | 32.179                          | 1.639e-213 | -56.326                         | 0.000     |

Table 16: Results of the paired t-tests based on pretrain setting (pretrained with MIMIC-III from PulseDB vs No pretrain) for DBP prediction with ResNet.

**BiLSTM**

| Normalization | Loss Function       | with HR                         |           | without HR                      |            |
|---------------|---------------------|---------------------------------|-----------|---------------------------------|------------|
|               |                     | $T_c = 1.96 / -1.96$<br>T-value | p-value   | $T_c = 1.96 / -1.96$<br>T-value | p-value    |
| Per Signal    | Mean Absolute Error | -10.055                         | 1.214e-23 | -10.247                         | 1.745e-24  |
| Per Signal    | Mean Squared Error  | 2.149                           | 2.505e-02 | 13.633                          | 7.569e-42  |
| Per Dataset   | Mean Absolute Error | 43.615                          | 0.000     | 29.880                          | 6.745e-186 |
| Per Dataset   | Mean Squared Error  | -45.648                         | 0.000     | -3.289                          | 1.009e-03  |

Table 17: Results of the paired t-tests based on pretrain setting (pretrained with MIMIC-III from PulseDB vs No pretrain) for SBP prediction with BiLSTM.

| Normalization | Loss Function       | with HR                         |            | without HR                      |           |
|---------------|---------------------|---------------------------------|------------|---------------------------------|-----------|
|               |                     | $T_c = 1.96 / -1.96$<br>T-value | p-value    | $T_c = 1.96 / -1.96$<br>T-value | p-value   |
| Per Signal    | Mean Absolute Error | -26.432                         | 1.439e-147 | -3.034                          | 2.420e-03 |
| Per Signal    | Mean Squared Error  | 31.291                          | 1.154e-202 | -11.100                         | 2.041e-28 |
| Per Dataset   | Mean Absolute Error | -3.136                          | 1.722e-03  | 19.232                          | 1.409e-80 |
| Per Dataset   | Mean Squared Error  | -17.753                         | 3.630e-69  | 6.940                           | 4.238e-12 |

Table 18: Results of the paired t-tests based on pretrain setting (pretrained with MIMIC-III from PulseDB vs No pretrain) for DBP prediction with BiLSTM.

Slapničar et al.

| Normalization | Loss Function       | with HR                         |            | without HR                      |            |
|---------------|---------------------|---------------------------------|------------|---------------------------------|------------|
|               |                     | $T_c = 1.96 / -1.96$<br>T-value | p-value    | $T_c = 1.96 / -1.96$<br>T-value | p-value    |
| Per Signal    | Mean Absolute Error | -7.009                          | 2.607e-12  | 39.818                          | 0.000      |
| Per Signal    | Mean Squared Error  | -4.690                          | 2.781e-06  | 26.582                          | 3.724e-149 |
| Per Dataset   | Mean Absolute Error | 25.407                          | 6.385e-137 | -5.040                          | 4.758e-07  |
| Per Dataset   | Mean Squared Error  | 12.626                          | 3.402e-36  | 14.529                          | 3.224e-47  |

Table 19: Results of the paired t-tests based on pretrain setting (pretrained with MIMIC-III from PulseDB vs No pretrain) for SBP prediction with Slapničar et al..

| Normalization | Loss Function       | with HR                         |           | without HR                      |           |
|---------------|---------------------|---------------------------------|-----------|---------------------------------|-----------|
|               |                     | $T_c = 1.96 / -1.96$<br>T-value | p-value   | $T_c = 1.96 / -1.96$<br>T-value | p-value   |
| Per Signal    | Mean Absolute Error | 5.159                           | 2.544e-07 | 58.179                          | 0.000     |
| Per Signal    | Mean Squared Error  | 17.395                          | 1.583e-66 | 21.276                          | 1.039e-97 |
| Per Dataset   | Mean Absolute Error | 13.372                          | 2.419e-40 | -8.046                          | 9.840e-16 |
| Per Dataset   | Mean Squared Error  | 9.791                           | 1.648e-22 | 13.187                          | 2.713e-39 |

Table 20: Results of the paired t-tests based on pretrain setting (pretrained with MIMIC-III from PulseDB vs No pretrain) for DBP prediction with Slapničar et al..

**BP-Net**

| Normalization | Loss Function       | with HR                         |           | without HR                      |           |
|---------------|---------------------|---------------------------------|-----------|---------------------------------|-----------|
|               |                     | $T_c = 1.96 / -1.96$<br>T-value | p-value   | $T_c = 1.96 / -1.96$<br>T-value | p-value   |
| Per Signal    | Mean Absolute Error | 6.369                           | 2.012e-10 | 2.847                           | 4.430e-03 |
| Per Signal    | Mean Squared Error  | -7.568                          | 4.224e-14 | 3.167                           | 1.548e-03 |
| Per Dataset   | Mean Absolute Error | -4.095                          | 4.256e-05 | 8.887                           | 7.656e-19 |
| Per Dataset   | Mean Squared Error  | 16.992                          | 1.285e-63 | -2.550                          | 1.079e-02 |

Table 21: Results of the paired t-tests based on pretrain setting (pretrained with MIMIC-III from PulseDB vs No pretrain) for SBP prediction with BP-Net.

| Normalization | Loss Function       | with HR                         |           | without HR                      |            |
|---------------|---------------------|---------------------------------|-----------|---------------------------------|------------|
|               |                     | $T_c = 1.96 / -1.96$<br>T-value | p-value   | $T_c = 1.96 / -1.96$<br>T-value | p-value    |
| Per Signal    | Mean Absolute Error | 9.790                           | 1.680e-22 | -2.982                          | 3.261e-02  |
| Per Signal    | Mean Squared Error  | 11.648                          | 4.216e-31 | 9.460                           | 3.990e-21  |
| Per Dataset   | Mean Absolute Error | 2.060                           | 3.944e-02 | 22.979                          | 3.829e-113 |
| Per Dataset   | Mean Squared Error  | 7.718                           | 1.328e-14 | -2.515                          | 6.065e-03  |

Table 22: Results of the paired t-tests based on pretrain setting (pretrained with MIMIC-III from PulseDB vs No pretrain) for DBP prediction with BP-Net.

### 3.2 Results of the paired t-tests based on HR feature

#### Alexnet

| Pretrain Dataset       | Normalization | Loss Function       | $T_c = 1.96 / -1.96$ |            |
|------------------------|---------------|---------------------|----------------------|------------|
|                        |               |                     | T-value              | p-value    |
| MIMIC-III from Kaggle  | Per Signal    | Mean Absolute Error | 8.120                | 5.369e-16  |
| MIMIC-III from Kaggle  | Per Signal    | Mean Squared Error  | 9.694                | 4.248e-22  |
| MIMIC-III from Kaggle  | Per Dataset   | Mean Absolute Error | 27.151               | 3.102e-155 |
| MIMIC-III from Kaggle  | Per Dataset   | Mean Squared Error  | -7.811               | 6.393e-15  |
| MIMIC-III from PulseDB | Per Signal    | Mean Absolute Error | 8.754                | 2.489e-18  |
| MIMIC-III from PulseDB | Per Signal    | Mean Squared Error  | 11.678               | 2.996e-31  |
| MIMIC-III from PulseDB | Per Dataset   | Mean Absolute Error | -7.171               | 8.127e-13  |
| MIMIC-III from PulseDB | Per Dataset   | Mean Squared Error  | -23.447              | 1.438e-117 |

Table 23: Results of the paired t-tests based on HR feature for SBP prediction with Alexnet.

| Pretrain Dataset       | Normalization | Loss Function       | $T_c = 1.96 / -1.96$ |            |
|------------------------|---------------|---------------------|----------------------|------------|
|                        |               |                     | T-value              | p-value    |
| MIMIC-III from Kaggle  | Per Signal    | Mean Absolute Error | -8.381               | 6.164e-17  |
| MIMIC-III from Kaggle  | Per Signal    | Mean Squared Error  | 0.940                | 3.472e-01  |
| MIMIC-III from Kaggle  | Per Dataset   | Mean Absolute Error | 6.624                | 3.739e-11  |
| MIMIC-III from Kaggle  | Per Dataset   | Mean Squared Error  | -33.378              | 1.528e-228 |
| MIMIC-III from PulseDB | Per Signal    | Mean Absolute Error | -4.561               | 5.159e-06  |
| MIMIC-III from PulseDB | Per Signal    | Mean Squared Error  | 14.064               | 2.167e-44  |
| MIMIC-III from PulseDB | Per Dataset   | Mean Absolute Error | 0.271                | 7.861e-01  |
| MIMIC-III from PulseDB | Per Dataset   | Mean Squared Error  | -37.746              | 1.152e-286 |

Table 24: Results of the paired t-tests based on HR feature for DBP prediction with Alexnet.

ResNet

| Pretrain Dataset       | Normalization | Loss Function       | $T_c = 1.96 / -1.96$ |            |
|------------------------|---------------|---------------------|----------------------|------------|
|                        |               |                     | T-value              | p-value    |
| MIMIC-III from Kaggle  | Per Signal    | Mean Absolute Error | 21.341               | 2.830e-98  |
| MIMIC-III from Kaggle  | Per Signal    | Mean Squared Error  | 3.442                | 5.803e-04  |
| MIMIC-III from Kaggle  | Per Dataset   | Mean Absolute Error | 15.637               | 2.661e-54  |
| MIMIC-III from Kaggle  | Per Dataset   | Mean Squared Error  | 9.509                | 2.502e-21  |
| MIMIC-III from PulseDB | Per Signal    | Mean Absolute Error | 9.421                | 5.790e-21  |
| MIMIC-III from PulseDB | Per Signal    | Mean Squared Error  | -3.118               | 1.827e-03  |
| MIMIC-III from PulseDB | Per Dataset   | Mean Absolute Error | 25.846               | 1.964e-141 |
| MIMIC-III from PulseDB | Per Dataset   | Mean Squared Error  | -4.404               | 1.076e-05  |

Table 25: Results of the paired t-tests based on HR feature for SBP prediction with ResNet.

| Pretrain Dataset       | Normalization | Loss Function       | $T_c = 1.96 / -1.96$ |            |
|------------------------|---------------|---------------------|----------------------|------------|
|                        |               |                     | T-value              | p-value    |
| MIMIC-III from Kaggle  | Per Signal    | Mean Absolute Error | 25.618               | 4.448e-139 |
| MIMIC-III from Kaggle  | Per Signal    | Mean Squared Error  | 6.118                | 9.911e-10  |
| MIMIC-III from Kaggle  | Per Dataset   | Mean Absolute Error | 3.801                | 1.452e-04  |
| MIMIC-III from Kaggle  | Per Dataset   | Mean Squared Error  | -15.465              | 3.602e-53  |
| MIMIC-III from PulseDB | Per Signal    | Mean Absolute Error | -9.842               | 1.002e-22  |
| MIMIC-III from PulseDB | Per Signal    | Mean Squared Error  | 17.313               | 6.239e-66  |
| MIMIC-III from PulseDB | Per Dataset   | Mean Absolute Error | 6.247                | 4.410e-10  |
| MIMIC-III from PulseDB | Per Dataset   | Mean Squared Error  | -28.805              | 1.536e-173 |

Table 26: Results of the paired t-tests based on HR feature for DBP prediction with ResNet.

**BiLSTM**

| Pretrain Dataset       | Normalization | Loss Function       | $T_c = 1.96 / -1.96$ |           |
|------------------------|---------------|---------------------|----------------------|-----------|
|                        |               |                     | T-value              | p-value   |
| MIMIC-III from Kaggle  | Per Signal    | Mean Absolute Error | 1.669                | 9.522e-02 |
| MIMIC-III from Kaggle  | Per Signal    | Mean Squared Error  | -5.830               | 5.753e-09 |
| MIMIC-III from Kaggle  | Per Dataset   | Mean Absolute Error | 19.777               | 5.329e-85 |
| MIMIC-III from Kaggle  | Per Dataset   | Mean Squared Error  | 4.078                | 4.590e-05 |
| MIMIC-III from PulseDB | Per Signal    | Mean Absolute Error | 10.677               | 1.982e-26 |
| MIMIC-III from PulseDB | Per Signal    | Mean Squared Error  | 2.501                | 1.240e-02 |
| MIMIC-III from PulseDB | Per Dataset   | Mean Absolute Error | 15.116               | 6.552e-51 |
| MIMIC-III from PulseDB | Per Dataset   | Mean Squared Error  | 9.021                | 2.306e-19 |

Table 27: Results of the paired t-tests based on HR feature for SBP prediction with BiLSTM.

| Pretrain Dataset       | Normalization | Loss Function       | $T_c = 1.96 / -1.96$ |            |
|------------------------|---------------|---------------------|----------------------|------------|
|                        |               |                     | T-value              | p-value    |
| MIMIC-III from Kaggle  | Per Signal    | Mean Absolute Error | 15.973               | 1.524e-56  |
| MIMIC-III from Kaggle  | Per Signal    | Mean Squared Error  | -0.651               | 5.152e-01  |
| MIMIC-III from Kaggle  | Per Dataset   | Mean Absolute Error | 26.496               | 3.089e-148 |
| MIMIC-III from Kaggle  | Per Dataset   | Mean Squared Error  | -17.328              | 4.872e-66  |
| MIMIC-III from PulseDB | Per Signal    | Mean Absolute Error | 24.218               | 5.122e-125 |
| MIMIC-III from PulseDB | Per Signal    | Mean Squared Error  | -19.221              | 1.719e-80  |
| MIMIC-III from PulseDB | Per Dataset   | Mean Absolute Error | 24.411               | 6.372e-127 |
| MIMIC-III from PulseDB | Per Dataset   | Mean Squared Error  | -7.625               | 2.734e-14  |

Table 28: Results of the paired t-tests based on HR feature for DBP prediction with BiLSTM.



Slapničar et al.

| Pretrain Dataset       | Normalization | Loss Function       | $T_c = 1.96 / -1.96$ |            |
|------------------------|---------------|---------------------|----------------------|------------|
|                        |               |                     | T-value              | p-value    |
| MIMIC-III from Kaggle  | Per Signal    | Mean Absolute Error | 21.098               | 3.699e-96  |
| MIMIC-III from Kaggle  | Per Signal    | Mean Squared Error  | 19.436               | 3.210e-82  |
| MIMIC-III from Kaggle  | Per Dataset   | Mean Absolute Error | -11.584              | 8.819e-31  |
| MIMIC-III from Kaggle  | Per Dataset   | Mean Squared Error  | -31.377              | 1.058e-203 |
| MIMIC-III from PulseDB | Per Signal    | Mean Absolute Error | 35.053               | 3.215e-250 |
| MIMIC-III from PulseDB | Per Signal    | Mean Squared Error  | 36.358               | 1.227e-267 |
| MIMIC-III from PulseDB | Per Dataset   | Mean Absolute Error | -22.628              | 7.154e-110 |
| MIMIC-III from PulseDB | Per Dataset   | Mean Squared Error  | 16.289               | 1.074e-58  |

Table 29: Results of the paired t-tests based on HR feature for SBP prediction with Slapničar et al..

| Pretrain Dataset       | Normalization | Loss Function       | $T_c = 1.96 / -1.96$ |            |
|------------------------|---------------|---------------------|----------------------|------------|
|                        |               |                     | T-value              | p-value    |
| MIMIC-III from Kaggle  | Per Signal    | Mean Absolute Error | 17.035               | 6.343e-64  |
| MIMIC-III from Kaggle  | Per Signal    | Mean Squared Error  | -8.463               | 3.083e-17  |
| MIMIC-III from Kaggle  | Per Dataset   | Mean Absolute Error | 12.022               | 5.277e-33  |
| MIMIC-III from Kaggle  | Per Dataset   | Mean Squared Error  | -14.889              | 1.818e-49  |
| MIMIC-III from PulseDB | Per Signal    | Mean Absolute Error | -7.415               | 1.342e-13  |
| MIMIC-III from PulseDB | Per Signal    | Mean Squared Error  | 32.664               | 1.526e-219 |
| MIMIC-III from PulseDB | Per Dataset   | Mean Absolute Error | -14.267              | 1.308e-45  |
| MIMIC-III from PulseDB | Per Dataset   | Mean Squared Error  | 15.445               | 4.866e-53  |

Table 30: Results of the paired t-tests based on HR feature for DBP prediction with Slapničar et al..

**BP-Net**

| Pretrain Dataset       | Normalization | Loss Function       | $T_c = 1.96 / -1.96$ |           |
|------------------------|---------------|---------------------|----------------------|-----------|
|                        |               |                     | T-value              | p-value   |
| MIMIC-III from Kaggle  | Per Signal    | Mean Absolute Error | 0.354                | 7.230e-01 |
| MIMIC-III from Kaggle  | Per Signal    | Mean Squared Error  | 2.086                | 3.703e-02 |
| MIMIC-III from Kaggle  | Per Dataset   | Mean Absolute Error | -1.424               | 1.544e-01 |
| MIMIC-III from Kaggle  | Per Dataset   | Mean Squared Error  | -1.081               | 2.797e-01 |
| MIMIC-III from PulseDB | Per Signal    | Mean Absolute Error | 2.511                | 1.206e-02 |
| MIMIC-III from PulseDB | Per Signal    | Mean Squared Error  | 2.955                | 3.139e-03 |
| MIMIC-III from PulseDB | Per Dataset   | Mean Absolute Error | 1.818                | 6.916e-02 |
| MIMIC-III from PulseDB | Per Dataset   | Mean Squared Error  | -11.182              | 8.228e-29 |

Table 31: Results of the paired t-tests based on HR feature for SBP prediction with BP-Net.

| Pretrain Dataset       | Normalization | Loss Function       | $T_c = 1.96 / -1.96$ |           |
|------------------------|---------------|---------------------|----------------------|-----------|
|                        |               |                     | T-value              | p-value   |
| MIMIC-III from Kaggle  | Per Signal    | Mean Absolute Error | -12.190              | 7.096e-34 |
| MIMIC-III from Kaggle  | Per Signal    | Mean Squared Error  | -8.100               | 6.347e-16 |
| MIMIC-III from Kaggle  | Per Dataset   | Mean Absolute Error | 9.055                | 1.704e-19 |
| MIMIC-III from Kaggle  | Per Dataset   | Mean Squared Error  | -0.583               | 5.601e-01 |
| MIMIC-III from PulseDB | Per Signal    | Mean Absolute Error | -6.743               | 1.663e-11 |
| MIMIC-III from PulseDB | Per Signal    | Mean Squared Error  | -8.130               | 4.963e-16 |
| MIMIC-III from PulseDB | Per Dataset   | Mean Absolute Error | 8.033                | 1.086e-15 |
| MIMIC-III from PulseDB | Per Dataset   | Mean Squared Error  | -3.629               | 2.864e-04 |

Table 32: Results of the paired t-tests based on HR feature for DBP prediction with BP-Net.

### 3.3 Results of the paired t-tests based on pretrain dataset (pretrained on MIMIC-III from Kaggle vs pretrained on MIMIC-III from PulseDB)

Alexnet

| Normalization | Loss Function       | with HR                         |           | without HR                      |           |
|---------------|---------------------|---------------------------------|-----------|---------------------------------|-----------|
|               |                     | $T_c = 1.96 / -1.96$<br>T-value | p-value   | $T_c = 1.96 / -1.96$<br>T-value | p-value   |
| Per Signal    | Mean Absolute Error | 4.968                           | 6.909e-07 | 5.033                           | 4.947e-07 |
| Per Signal    | Mean Squared Error  | -18.029                         | 3.108e-71 | -14.831                         | 4.221e-49 |
| Per Dataset   | Mean Absolute Error | 8.851                           | 1.062e-18 | -14.937                         | 9.079e-50 |
| Per Dataset   | Mean Squared Error  | 16.504                          | 3.533e-60 | -2.612                          | 9.030e-03 |

Table 33: Results of the paired t-tests based on pretrain dataset for SBP prediction with Alexnet.

| Normalization | Loss Function       | with HR                         |            | without HR                      |            |
|---------------|---------------------|---------------------------------|------------|---------------------------------|------------|
|               |                     | $T_c = 1.96 / -1.96$<br>T-value | p-value    | $T_c = 1.96 / -1.96$<br>T-value | p-value    |
| Per Signal    | Mean Absolute Error | -8.001                          | 1.407e-15  | -3.322                          | 8.964e-04  |
| Per Signal    | Mean Squared Error  | -38.490                         | 4.641e-297 | -22.561                         | 2.916e-109 |
| Per Dataset   | Mean Absolute Error | 8.518                           | 1.926e-17  | 2.132                           | 3.305e-02  |
| Per Dataset   | Mean Squared Error  | 22.629                          | 6.881e-110 | 30.699                          | 1.490e-195 |

Table 34: Results of the paired t-tests based on pretrain dataset for DBP prediction with Alexnet.

ResNet

| Normalization | Loss Function       | with HR                         |           | without HR                      |            |
|---------------|---------------------|---------------------------------|-----------|---------------------------------|------------|
|               |                     | $T_c = 1.96 / -1.96$<br>T-value | p-value   | $T_c = 1.96 / -1.96$<br>T-value | p-value    |
| Per Signal    | Mean Absolute Error | 13.840                          | 4.646e-43 | -6.419                          | 1.448e-10  |
| Per Signal    | Mean Squared Error  | 12.566                          | 7.166e-36 | 4.298                           | 1.741e-05  |
| Per Dataset   | Mean Absolute Error | 14.911                          | 1.339e-49 | 24.879                          | 1.423e-131 |
| Per Dataset   | Mean Squared Error  | -0.084                          | 9.334e-01 | -11.733                         | 1.575e-31  |

Table 35: Results of the paired t-tests based on pretrain dataset for SBP prediction with ResNet.

| Normalization | Loss Function       | with HR                         |            | without HR                      |            |
|---------------|---------------------|---------------------------------|------------|---------------------------------|------------|
|               |                     | $T_c = 1.96 / -1.96$<br>T-value | p-value    | $T_c = 1.96 / -1.96$<br>T-value | p-value    |
| Per Signal    | Mean Absolute Error | 31.084                          | 3.687e-200 | -4.230                          | 2.360e-05  |
| Per Signal    | Mean Squared Error  | 20.363                          | 7.264e-90  | 29.656                          | 2.755e-183 |
| Per Dataset   | Mean Absolute Error | -22.332                         | 3.754e-107 | -15.962                         | 1.813e-56  |
| Per Dataset   | Mean Squared Error  | 1.162                           | 2.454e-01  | -24.910                         | 6.958e-132 |

Table 36: Results of the paired t-tests based on pretrain dataset for DBP prediction with ResNet.

**BiLSTM**

| Normalization | Loss Function       | with HR                         |           | without HR                      |           |
|---------------|---------------------|---------------------------------|-----------|---------------------------------|-----------|
|               |                     | $T_c = 1.96 / -1.96$<br>T-value | p-value   | $T_c = 1.96 / -1.96$<br>T-value | p-value   |
| Per Signal    | Mean Absolute Error | -8.161                          | 3.850e-16 | 5.513                           | 3.630e-08 |
| Per Signal    | Mean Squared Error  | -5.063                          | 4.231e-07 | 6.825                           | 9.464e-12 |
| Per Dataset   | Mean Absolute Error | 20.181                          | 2.435e-88 | 8.138                           | 4.634e-16 |
| Per Dataset   | Mean Squared Error  | -11.575                         | 9.837e-31 | -1.690                          | 9.107e-02 |

Table 37: Results of the paired t-tests based on pretrain dataset for SBP prediction with BiLSTM.

| Normalization | Loss Function       | with HR                         |            | without HR                      |           |
|---------------|---------------------|---------------------------------|------------|---------------------------------|-----------|
|               |                     | $T_c = 1.96 / -1.96$<br>T-value | p-value    | $T_c = 1.96 / -1.96$<br>T-value | p-value   |
| Per Signal    | Mean Absolute Error | -18.507                         | 6.953e-75  | -1.138                          | 2.553e-01 |
| Per Signal    | Mean Squared Error  | 22.940                          | 8.867e-113 | -0.964                          | 3.348e-01 |
| Per Dataset   | Mean Absolute Error | 22.107                          | 4.120e-105 | 16.728                          | 9.571e-62 |
| Per Dataset   | Mean Squared Error  | -16.378                         | 2.617e-59  | -5.821                          | 6.070e-09 |

Table 38: Results of the paired t-tests based on pretrain dataset for DBP prediction with BiLSTM.

Slapničar et al.

| Normalization | Loss Function       | with HR                         |            | without HR                      |            |
|---------------|---------------------|---------------------------------|------------|---------------------------------|------------|
|               |                     | $T_c = 1.96 / -1.96$<br>T-value | p-value    | $T_c = 1.96 / -1.96$<br>T-value | p-value    |
| Per Signal    | Mean Absolute Error | 3.829                           | 1.297e-04  | 25.564                          | 1.582e-138 |
| Per Signal    | Mean Squared Error  | -7.310                          | 2.941e-13  | 6.953                           | 3.863e-12  |
| Per Dataset   | Mean Absolute Error | 22.841                          | 7.520e-112 | 18.797                          | 3.877e-77  |
| Per Dataset   | Mean Squared Error  | -35.725                         | 3.936e-259 | 13.957                          | 9.493e-44  |

Table 39: Results of the paired t-tests based on pretrain dataset for SBP prediction with Slapničar et al..

| Normalization | Loss Function       | with HR                         |            | without HR                      |            |
|---------------|---------------------|---------------------------------|------------|---------------------------------|------------|
|               |                     | $T_c = 1.96 / -1.96$<br>T-value | p-value    | $T_c = 1.96 / -1.96$<br>T-value | p-value    |
| Per Signal    | Mean Absolute Error | 48.936                          | 0.000      | 26.238                          | 1.600e-145 |
| Per Signal    | Mean Squared Error  | -28.393                         | 6.802e-169 | 15.298                          | 4.410e-52  |
| Per Dataset   | Mean Absolute Error | 15.087                          | 1.013e-50  | -21.991                         | 4.637e-104 |
| Per Dataset   | Mean Squared Error  | -27.625                         | 2.143e-160 | 0.168                           | 8.665e-01  |

Table 40: Results of the paired t-tests based on pretrain dataset for DBP prediction with Slapničar et al..

**BP-Net**

| Normalization | Loss Function       | with HR                         |           | without HR                      |           |
|---------------|---------------------|---------------------------------|-----------|---------------------------------|-----------|
|               |                     | $T_c = 1.96 / -1.96$<br>T-value | p-value   | $T_c = 1.96 / -1.96$<br>T-value | p-value   |
| Per Signal    | Mean Absolute Error | 5.692                           | 1.297e-08 | 7.994                           | 1.493e-15 |
| Per Signal    | Mean Squared Error  | -2.123                          | 3.376e-02 | -1.167                          | 2.431e-01 |
| Per Dataset   | Mean Absolute Error | -2.374                          | 1.763e-02 | 0.868                           | 3.856e-01 |
| Per Dataset   | Mean Squared Error  | 11.558                          | 1.194e-30 | 1.383                           | 1.666e-01 |

Table 41: Results of the paired t-tests based on pretrain dataset for SBP prediction with BP-Net.

| Normalization | Loss Function       | with HR                         |           | without HR                      |           |
|---------------|---------------------|---------------------------------|-----------|---------------------------------|-----------|
|               |                     | $T_c = 1.96 / -1.96$<br>T-value | p-value   | $T_c = 1.96 / -1.96$<br>T-value | p-value   |
| Per Signal    | Mean Absolute Error | -1.274                          | 2.028e-01 | 3.763                           | 1.693e-04 |
| Per Signal    | Mean Squared Error  | 4.693                           | 2.742e-06 | 4.846                           | 1.284e-06 |
| Per Dataset   | Mean Absolute Error | 0.946                           | 3.440e-01 | -0.449                          | 6.532e-01 |
| Per Dataset   | Mean Squared Error  | 0.844                           | 3.987e-01 | -2.203                          | 2.761e-02 |

Table 42: Results of the paired t-tests based on pretrain dataset for DBP prediction with BP-Net.

### 3.4 Results of the paired t-tests based on normalization methods

#### Alexnet

| Pretrain Dataset       | Loss Function       | with HR                         |            | without HR                      |           |
|------------------------|---------------------|---------------------------------|------------|---------------------------------|-----------|
|                        |                     | $T_c = 1.96 / -1.96$<br>T-value | p-value    | $T_c = 1.96 / -1.96$<br>T-value | p-value   |
| MIMIC-III from Kaggle  | Mean Absolute Error | -0.063                          | 9.500e-01  | 10.626                          | 3.398e-26 |
| MIMIC-III from Kaggle  | Mean Squared Error  | -3.235                          | 1.221e-03  | -17.533                         | 1.531e-67 |
| MIMIC-III from PulseDB | Mean Absolute Error | 3.752                           | 1.768e-04  | -10.252                         | 1.657e-24 |
| MIMIC-III from PulseDB | Mean Squared Error  | 27.925                          | 1.072e-163 | -6.251                          | 4.283e-10 |

Table 43: Results of the paired t-tests based on normalization methods for SBP prediction with Alexnet.

| Pretrain Dataset       | Loss Function       | with HR                         |            | without HR                      |            |
|------------------------|---------------------|---------------------------------|------------|---------------------------------|------------|
|                        |                     | $T_c = 1.96 / -1.96$<br>T-value | p-value    | $T_c = 1.96 / -1.96$<br>T-value | p-value    |
| MIMIC-III from Kaggle  | Mean Absolute Error | -22.031                         | 2.009e-104 | -7.194                          | 6.870e-13  |
| MIMIC-III from Kaggle  | Mean Squared Error  | -31.531                         | 1.425e-205 | -44.377                         | 0.000      |
| MIMIC-III from PulseDB | Mean Absolute Error | -5.854                          | 4.997e-09  | -2.470                          | 1.353e-02  |
| MIMIC-III from PulseDB | Mean Squared Error  | 22.158                          | 1.426e-105 | -22.451                         | 3.042e-108 |

Table 44: Results of the paired t-tests based on normalization methods for DBP prediction with Alexnet.



**ResNet**

| Pretrain Dataset       | Loss Function       | with HR                         |           | without HR                      |            |
|------------------------|---------------------|---------------------------------|-----------|---------------------------------|------------|
|                        |                     | $T_c = 1.96 / -1.96$<br>T-value | p-value   | $T_c = 1.96 / -1.96$<br>T-value | p-value    |
| MIMIC-III from Kaggle  | Mean Absolute Error | 2.420                           | 1.554e-02 | -6.106                          | 1.067e-09  |
| MIMIC-III from Kaggle  | Mean Squared Error  | 10.511                          | 1.142e-25 | 13.428                          | 1.161e-40  |
| MIMIC-III from PulseDB | Mean Absolute Error | 5.622                           | 1.952e-08 | 25.992                          | 5.919e-143 |
| MIMIC-III from PulseDB | Mean Squared Error  | -1.928                          | 5.385e-02 | -3.968                          | 7.302e-05  |

Table 45: Results of the paired t-tests based on normalization methods for SBP prediction with ResNet.

| Pretrain Dataset       | Loss Function       | with HR                         |            | without HR                      |            |
|------------------------|---------------------|---------------------------------|------------|---------------------------------|------------|
|                        |                     | $T_c = 1.96 / -1.96$<br>T-value | p-value    | $T_c = 1.96 / -1.96$<br>T-value | p-value    |
| MIMIC-III from Kaggle  | Mean Absolute Error | 15.172                          | 2.879e-51  | -1.597                          | 1.103e-01  |
| MIMIC-III from Kaggle  | Mean Squared Error  | 32.826                          | 1.425e-221 | 13.878                          | 2.778e-43  |
| MIMIC-III from PulseDB | Mean Absolute Error | -28.663                         | 6.255e-172 | -12.541                         | 9.811e-36  |
| MIMIC-III from PulseDB | Mean Squared Error  | 10.377                          | 4.572e-25  | -31.689                         | 1.687e-207 |

Table 46: Results of the paired t-tests based on normalization methods for DBP prediction with ResNet.

### BiLSTM

| Pretrain Dataset       | Loss Function       | with HR                         |           | without HR                      |           |
|------------------------|---------------------|---------------------------------|-----------|---------------------------------|-----------|
|                        |                     | $T_c = 1.96 / -1.96$<br>T-value | p-value   | $T_c = 1.96 / -1.96$<br>T-value | p-value   |
| MIMIC-III from Kaggle  | Mean Absolute Error | -20.681                         | 1.461e-92 | 7.344                           | 2.275e-13 |
| MIMIC-III from Kaggle  | Mean Squared Error  | -14.264                         | 1.362e-45 | 2.614                           | 8.966e-03 |
| MIMIC-III from PulseDB | Mean Absolute Error | 0.324                           | 7.460e-01 | 9.938                           | 3.896e-23 |
| MIMIC-III from PulseDB | Mean Squared Error  | -17.725                         | 5.846e-69 | -5.901                          | 3.753e-09 |

Table 47: Results of the paired t-tests based on normalization methods for SBP prediction with BiLSTM.

| Pretrain Dataset       | Loss Function       | with HR                         |            | without HR                      |            |
|------------------------|---------------------|---------------------------------|------------|---------------------------------|------------|
|                        |                     | $T_c = 1.96 / -1.96$<br>T-value | p-value    | $T_c = 1.96 / -1.96$<br>T-value | p-value    |
| MIMIC-III from Kaggle  | Mean Absolute Error | -9.358                          | 1.043e-20  | 8.867                           | 9.156e-19  |
| MIMIC-III from Kaggle  | Mean Squared Error  | 14.297                          | 8.605e-46  | -11.753                         | 1.252e-31  |
| MIMIC-III from PulseDB | Mean Absolute Error | 21.600                          | 1.450e-100 | 28.555                          | 1.042e-170 |
| MIMIC-III from PulseDB | Mean Squared Error  | -22.845                         | 6.900e-112 | -18.255                         | 6.046e-73  |

Table 48: Results of the paired t-tests based on normalization methods for DBP prediction with BiLSTM.

Slapničar et al.

| Pretrain Dataset       | Loss Function       | with HR                         |            | without HR                      |            |
|------------------------|---------------------|---------------------------------|------------|---------------------------------|------------|
|                        |                     | $T_c = 1.96 / -1.96$<br>T-value | p-value    | $T_c = 1.96 / -1.96$<br>T-value | p-value    |
| MIMIC-III from Kaggle  | Mean Absolute Error | 5.859                           | 4.857e-09  | -31.272                         | 1.987e-202 |
| MIMIC-III from Kaggle  | Mean Squared Error  | 29.976                          | 5.179e-187 | -21.397                         | 9.110e-99  |
| MIMIC-III from PulseDB | Mean Absolute Error | 26.020                          | 3.036e-143 | -32.662                         | 1.592e-219 |
| MIMIC-III from PulseDB | Mean Squared Error  | -1.560                          | 1.189e-01  | -15.557                         | 9.039e-54  |

Table 49: Results of the paired t-tests based on normalization methods for SBP prediction with Slapničar et al..

| Pretrain Dataset       | Loss Function       | with HR                         |           | without HR                      |            |
|------------------------|---------------------|---------------------------------|-----------|---------------------------------|------------|
|                        |                     | $T_c = 1.96 / -1.96$<br>T-value | p-value   | $T_c = 1.96 / -1.96$<br>T-value | p-value    |
| MIMIC-III from Kaggle  | Mean Absolute Error | 5.637                           | 1.794e-08 | 2.280                           | 2.262e-02  |
| MIMIC-III from Kaggle  | Mean Squared Error  | 5.396                           | 7.025e-08 | -4.194                          | 2.773e-05  |
| MIMIC-III from PulseDB | Mean Absolute Error | -13.284                         | 7.668e-40 | -31.430                         | 2.403e-204 |
| MIMIC-III from PulseDB | Mean Squared Error  | -6.627                          | 3.655e-11 | -12.885                         | 1.318e-37  |

Table 50: Results of the paired t-tests based on normalization methods for DBP prediction with Slapničar et al..

**BP-Net**

| Pretrain Dataset       | Loss Function       | with HR                         |           | without HR                      |           |
|------------------------|---------------------|---------------------------------|-----------|---------------------------------|-----------|
|                        |                     | $T_c = 1.96 / -1.96$<br>T-value | p-value   | $T_c = 1.96 / -1.96$<br>T-value | p-value   |
| MIMIC-III from Kaggle  | Mean Absolute Error | 6.079                           | 1.268e-09 | 4.331                           | 1.503e-05 |
| MIMIC-III from Kaggle  | Mean Squared Error  | 0.785                           | 4.324e-01 | -2.381                          | 1.727e-02 |
| MIMIC-III from PulseDB | Mean Absolute Error | -1.905                          | 5.685e-02 | -2.494                          | 1.267e-02 |
| MIMIC-III from PulseDB | Mean Squared Error  | 14.509                          | 4.314e-47 | 0.225                           | 8.223e-01 |

Table 51: Results of the paired t-tests based on normalization methods for SBP prediction with BP-Net.

| Pretrain Dataset       | Loss Function       | with HR                         |           | without HR                      |           |
|------------------------|---------------------|---------------------------------|-----------|---------------------------------|-----------|
|                        |                     | $T_c = 1.96 / -1.96$<br>T-value | p-value   | $T_c = 1.96 / -1.96$<br>T-value | p-value   |
| MIMIC-III from Kaggle  | Mean Absolute Error | -7.366                          | 1.930e-13 | 13.996                          | 5.545e-44 |
| MIMIC-III from Kaggle  | Mean Squared Error  | -4.144                          | 3.447e-05 | 3.414                           | 6.429e-04 |
| MIMIC-III from PulseDB | Mean Absolute Error | -5.184                          | 2.230e-07 | 9.625                           | 8.295e-22 |
| MIMIC-III from PulseDB | Mean Squared Error  | -8.148                          | 4.289e-16 | -3.683                          | 2.320e-04 |

Table 52: Results of the paired t-tests based on normalization methods for DBP prediction with BP-Net.

### 3.5 Results of the paired t-tests based on loss function

#### Alexnet

| Pretrain Dataset       | Normalization | with HR                         |           | without HR                      |           |
|------------------------|---------------|---------------------------------|-----------|---------------------------------|-----------|
|                        |               | $T_c = 1.96 / -1.96$<br>T-value | p-value   | $T_c = 1.96 / -1.96$<br>T-value | p-value   |
| MIMIC-III from Kaggle  | Per Signal    | 20.599                          | 7.355e-92 | 18.651                          | 5.386e-76 |
| MIMIC-III from Kaggle  | Per Dataset   | 17.319                          | 5.602e-66 | -14.901                         | 1.527e-49 |
| MIMIC-III from PulseDB | Per Signal    | -6.295                          | 3.237e-10 | -2.864                          | 4.191e-03 |
| MIMIC-III from PulseDB | Per Dataset   | 18.628                          | 8.044e-76 | 1.820                           | 6.873e-02 |

Table 53: Results of the paired t-tests based on loss function for SBP prediction with Alexnet.

| Pretrain Dataset       | Normalization | with HR                         |           | without HR                      |            |
|------------------------|---------------|---------------------------------|-----------|---------------------------------|------------|
|                        |               | $T_c = 1.96 / -1.96$<br>T-value | p-value   | $T_c = 1.96 / -1.96$<br>T-value | p-value    |
| MIMIC-III from Kaggle  | Per Signal    | 9.596                           | 1.097e-21 | 20.317                          | 1.770e-89  |
| MIMIC-III from Kaggle  | Per Dataset   | -1.667                          | 9.546e-02 | -35.241                         | 1.073e-252 |
| MIMIC-III from PulseDB | Per Signal    | -21.208                         | 4.084e-97 | 0.328                           | 7.428e-01  |
| MIMIC-III from PulseDB | Per Dataset   | 12.174                          | 8.571e-34 | -21.884                         | 4.212e-103 |

Table 54: Results of the paired t-tests based on loss function for DBP prediction with Alexnet.

ResNet

| Pretrain Dataset       | Normalization | with HR                         |            | without HR                      |            |
|------------------------|---------------|---------------------------------|------------|---------------------------------|------------|
|                        |               | $T_c = 1.96 / -1.96$<br>T-value | p-value    | $T_c = 1.96 / -1.96$<br>T-value | p-value    |
| MIMIC-III from Kaggle  | Per Signal    | 29.545                          | 5.241e-182 | -31.238                         | 5.164e-202 |
| MIMIC-III from Kaggle  | Per Dataset   | 20.508                          | 4.319e-91  | 13.568                          | 1.818e-41  |
| MIMIC-III from PulseDB | Per Signal    | 18.098                          | 9.445e-72  | -3.950                          | 7.879e-05  |
| MIMIC-III from PulseDB | Per Dataset   | 1.197                           | 2.315e-01  | -50.982                         | 0.000      |

Table 55: Results of the paired t-tests based on loss function for SBP prediction with ResNet.

| Pretrain Dataset       | Normalization | with HR                         |            | without HR                      |         |
|------------------------|---------------|---------------------------------|------------|---------------------------------|---------|
|                        |               | $T_c = 1.96 / -1.96$<br>T-value | p-value    | $T_c = 1.96 / -1.96$<br>T-value | p-value |
| MIMIC-III from Kaggle  | Per Signal    | -141.429                        | 0.000      | -147.114                        | 0.000   |
| MIMIC-III from Kaggle  | Per Dataset   | -66.691                         | 0.000      | -92.487                         | 0.000   |
| MIMIC-III from PulseDB | Per Signal    | -158.222                        | 0.000      | -61.698                         | 0.000   |
| MIMIC-III from PulseDB | Per Dataset   | -26.990                         | 1.677e-153 | -77.237                         | 0.000   |

Table 56: Results of the paired t-tests based on loss function for DBP prediction with ResNet.

**BiLSTM**

| Pretrain Dataset       | Normalization | with HR                         |           | without HR                      |            |
|------------------------|---------------|---------------------------------|-----------|---------------------------------|------------|
|                        |               | $T_c = 1.96 / -1.96$<br>T-value | p-value   | $T_c = 1.96 / -1.96$<br>T-value | p-value    |
| MIMIC-III from Kaggle  | Per Signal    | -4.421                          | 9.940e-06 | -16.656                         | 3.076e-61  |
| MIMIC-III from Kaggle  | Per Dataset   | 11.239                          | 4.355e-29 | -37.527                         | 1.236e-283 |
| MIMIC-III from PulseDB | Per Signal    | 0.013                           | 9.899e-01 | -35.006                         | 1.336e-249 |
| MIMIC-III from PulseDB | Per Dataset   | -21.061                         | 7.867e-96 | -40.258                         | 0.000      |

Table 57: Results of the paired t-tests based on loss function for SBP prediction with BiLSTM.

| Pretrain Dataset       | Normalization | with HR                         |            | without HR                      |         |
|------------------------|---------------|---------------------------------|------------|---------------------------------|---------|
|                        |               | $T_c = 1.96 / -1.96$<br>T-value | p-value    | $T_c = 1.96 / -1.96$<br>T-value | p-value |
| MIMIC-III from Kaggle  | Per Signal    | -14.225                         | 2.347e-45  | -71.815                         | 0.000   |
| MIMIC-III from Kaggle  | Per Dataset   | 10.204                          | 2.710e-24  | -91.967                         | 0.000   |
| MIMIC-III from PulseDB | Per Signal    | 20.165                          | 3.333e-88  | -81.196                         | 0.000   |
| MIMIC-III from PulseDB | Per Dataset   | -39.367                         | 1.685e-309 | -147.937                        | 0.000   |

Table 58: Results of the paired t-tests based on loss function for DBP prediction with BiLSTM.

Slapničar et al.

| Pretrain Dataset       | Normalization | with HR                         |            | without HR                      |            |
|------------------------|---------------|---------------------------------|------------|---------------------------------|------------|
|                        |               | $T_c = 1.96 / -1.96$<br>T-value | p-value    | $T_c = 1.96 / -1.96$<br>T-value | p-value    |
| MIMIC-III from Kaggle  | Per Signal    | -5.223                          | 1.805e-07  | -13.687                         | 3.697e-42  |
| MIMIC-III from Kaggle  | Per Dataset   | 19.555                          | 3.470e-83  | 4.793                           | 1.673e-06  |
| MIMIC-III from PulseDB | Per Signal    | -22.060                         | 1.116e-104 | -35.769                         | 1.026e-259 |
| MIMIC-III from PulseDB | Per Dataset   | -37.020                         | 1.173e-276 | -0.741                          | 4.589e-01  |

Table 59: Results of the paired t-tests based on loss function for SBP prediction with Slapničar et al..

| Pretrain Dataset       | Normalization | with HR                         |            | without HR                      |           |
|------------------------|---------------|---------------------------------|------------|---------------------------------|-----------|
|                        |               | $T_c = 1.96 / -1.96$<br>T-value | p-value    | $T_c = 1.96 / -1.96$<br>T-value | p-value   |
| MIMIC-III from Kaggle  | Per Signal    | -1.480                          | 1.389e-01  | -54.074                         | 0.000     |
| MIMIC-III from Kaggle  | Per Dataset   | -2.833                          | 4.627e-03  | -67.087                         | 0.000     |
| MIMIC-III from PulseDB | Per Signal    | -91.429                         | 0.000      | -68.986                         | 0.000     |
| MIMIC-III from PulseDB | Per Dataset   | -38.240                         | 1.508e-293 | -16.581                         | 1.017e-60 |

Table 60: Results of the paired t-tests based on loss function for DBP prediction with Slapničar et al..



**BP-Net**

| Pretrain Dataset       | Normalization | with HR                         |           | without HR                      |           |
|------------------------|---------------|---------------------------------|-----------|---------------------------------|-----------|
|                        |               | $T_c = 1.96 / -1.96$<br>T-value | p-value   | $T_c = 1.96 / -1.96$<br>T-value | p-value   |
| MIMIC-III from Kaggle  | Per Signal    | 0.109                           | 9.130e-01 | 1.855                           | 6.357e-02 |
| MIMIC-III from Kaggle  | Per Dataset   | -5.244                          | 1.614e-07 | -4.828                          | 1.406e-06 |
| MIMIC-III from PulseDB | Per Signal    | -7.914                          | 2.823e-15 | -7.242                          | 4.827e-13 |
| MIMIC-III from PulseDB | Per Dataset   | 8.540                           | 1.600e-17 | -4.344                          | 1.417e-05 |

Table 61: Results of the paired t-tests based on loss function for SBP prediction with BP-Net.

| Pretrain Dataset       | Normalization | with HR                         |           | without HR                      |           |
|------------------------|---------------|---------------------------------|-----------|---------------------------------|-----------|
|                        |               | $T_c = 1.96 / -1.96$<br>T-value | p-value   | $T_c = 1.96 / -1.96$<br>T-value | p-value   |
| MIMIC-III from Kaggle  | Per Signal    | -3.602                          | 3.177e-04 | 0.482                           | 6.298e-01 |
| MIMIC-III from Kaggle  | Per Dataset   | -0.236                          | 8.138e-01 | -10.130                         | 5.721e-24 |
| MIMIC-III from PulseDB | Per Signal    | 2.440                           | 1.469e-02 | 1.399                           | 1.618e-01 |
| MIMIC-III from PulseDB | Per Dataset   | -0.372                          | 7.099e-01 | -12.096                         | 2.207e-33 |

Table 62: Results of the paired t-tests based on loss function for DBP prediction with BP-Net.

### 3.6 Results of the ANOVA test based on model architecture

| Pretrain Dataset       | Normalization | Loss Function       | with HR<br>$F_c = 2.37$ |              | without HR<br>$F_c = 2.37$ |              |
|------------------------|---------------|---------------------|-------------------------|--------------|----------------------------|--------------|
|                        |               |                     | F-value                 | p-value      | F-value                    | p-value      |
| MIMIC-III from Kaggle  | Per Signal    | Mean Absolute Error | $F(4,39250) = 141.077$  | $6.034e-120$ | $F(4,39250) = 135.641$     | $2.626e-115$ |
| MIMIC-III from Kaggle  | Per Signal    | Mean Squared Error  | $F(4,39250) = 56.479$   | $1.374e-47$  | $F(4,39250) = 8.627$       | $5.896e-07$  |
| MIMIC-III from Kaggle  | Per Dataset   | Mean Absolute Error | $F(4,39250) = 152.609$  | $8.806e-130$ | $F(4,39250) = 152.385$     | $1.367e-129$ |
| MIMIC-III from Kaggle  | Per Dataset   | Mean Squared Error  | $F(4,39250) = 133.960$  | $7.162e-114$ | $F(4,39250) = 139.497$     | $1.345e-118$ |
| MIMIC-III from PulseDB | Per Signal    | Mean Absolute Error | $F(4,39250) = 122.177$  | $8.283e-104$ | $F(4,39250) = 152.385$     | $1.367e-129$ |
| MIMIC-III from PulseDB | Per Signal    | Mean Squared Error  | $F(4,39250) = 196.190$  | $7.233e-167$ | $F(4,39250) = 88.388$      | $6.559e-75$  |
| MIMIC-III from PulseDB | Per Dataset   | Mean Absolute Error | $F(4,39250) = 126.193$  | $3.068e-107$ | $F(4,39250) = 268.562$     | $3.838e-228$ |
| MIMIC-III from PulseDB | Per Dataset   | Mean Squared Error  | $F(4,39250) = 136.461$  | $5.244e-116$ | $F(4,39250) = 102.881$     | $2.600e-87$  |

Table 63: Effects of different models (5 models) on SBP prediction errors as functions of pretrain dataset (Kaggle / PulseDB); Normalization methods (per signal / per dataset); Loss function (MAE / MSE); With / without HR during training.

| Pretrain Dataset       | Normalization | Loss Function       | with HR<br>$F_c = 2.37$ |              | without HR<br>$F_c = 2.37$ |              |
|------------------------|---------------|---------------------|-------------------------|--------------|----------------------------|--------------|
|                        |               |                     | F-value                 | p-value      | F-value                    | p-value      |
| MIMIC-III from Kaggle  | Per Signal    | Mean Absolute Error | $F(4,39250) = 85.956$   | $7.915e-73$  | $F(4,39250) = 207.187$     | $3.334e-176$ |
| MIMIC-III from Kaggle  | Per Signal    | Mean Squared Error  | $F(4,39250) = 23.193$   | $3.578e-19$  | $F(4,39250) = 22.354$      | $1.841e-18$  |
| MIMIC-III from Kaggle  | Per Dataset   | Mean Absolute Error | $F(4,39250) = 227.156$  | $3.911e-193$ | $F(4,39250) = 213.919$     | $6.487e-182$ |
| MIMIC-III from Kaggle  | Per Dataset   | Mean Squared Error  | $F(4,39250) = 81.211$   | $9.145e-69$  | $F(4,39250) = 896.255$     | $0.000$      |
| MIMIC-III from PulseDB | Per Signal    | Mean Absolute Error | $F(4,39250) = 207.461$  | $1.949e-176$ | $F(4,39250) = 176.984$     | $1.533e-150$ |
| MIMIC-III from PulseDB | Per Signal    | Mean Squared Error  | $F(4,39250) = 160.353$  | $2.216e-136$ | $F(4,39250) = 28.687$      | $7.657e-24$  |
| MIMIC-III from PulseDB | Per Dataset   | Mean Absolute Error | $F(4,39250) = 90.346$   | $1.382e-76$  | $F(4,39250) = 179.276$     | $1.722e-152$ |
| MIMIC-III from PulseDB | Per Dataset   | Mean Squared Error  | $F(4,39250) = 71.078$   | $4.338e-60$  | $F(4,39250) = 70.519$      | $1.306e-59$  |

Table 64: Effects of different models (5 models) on DBP prediction errors as functions of pretrain dataset (Kaggle / PulseDB); Normalization methods (per signal / per dataset); Loss function (MAE / MSE); With / without HR during training.

While results of the ANOVA tests confirm that different model architectures can lead to significant difference in model performance, the large sample sizes typically used in model training can cause bias and amplify even small changes into significant results. Nonetheless, a large range of F-values (ranging from 8.627 to 896.255) is observed, suggesting future work with permutation correction can reduce the bias and uncover finer differentiation in the results.
